# Supplementary material for: Exploring the solvent mediated assembly and redox activity of a POM–organic hybrid [Na(SO3)2(PhPO3)4MoV4MoVI14O49]5−
Source: Royal Society of Chemistry journal article supplement (doi:10.1039/c6nj01774f), 2016-01-01
Supplement: c6nj01774f1.pdf [file c6nj01774f1.pdf]

## ESI

### Exploring the Solvent Mediated Assembly and Redox Activity of a POM-Organic Hybrid $[\text{Na}(\text{SO}_3)_2(\text{PhPO}_3)_4\text{Mo}^{\text{V}}_4\text{Mo}^{\text{VI}}_{14}\text{O}_{49}]^{5-}$

Masaru Fujibayashi,<sup>a</sup> Yu-Fei Song,<sup>b</sup> Leroy Cronin\*<sup>c</sup> and Ryo Tsunashima\*<sup>a</sup>

<sup>a</sup>Graduate School of Science and Technology for Innovation, Yamaguchi University, 1677-1, Yoshida, Yamaguchi, 753 8512, Japan.

<sup>b</sup>State Key Laboratory of Chemical Resource Engineering, Beijing University of Chemical Technology, 100029 Beijing, China

<sup>c</sup>School of Chemistry, The University of Glasgow, Glasgow, G12 8QQ, United Kingdom.

= Contents =

1. Electrochemical study
2. BVS
3. NMR

*New Journal of Chemistry*

#### 1. Electrochemical study

Table S1-1. Summary of electrochemical data

| $E^{\text{ox}} / \text{V}$ | $E^{\text{red}} / \text{V}$ | $\Delta E = E^{\text{ox}} - E^{\text{red}} / \text{mV}$ | $E_{\text{mid}} / \text{V}$ | reaction |
|----------------------------|-----------------------------|---------------------------------------------------------|-----------------------------|----------|
| -0.580                     | -0.683                      | 103                                                     | -0.63                       | I        |
| 0.266                      | 0.204                       | 62                                                      | 0.24                        | II       |
| 0.713                      | 0.636                       | 77                                                      | 0.67                        | III      |

## 2. BVS

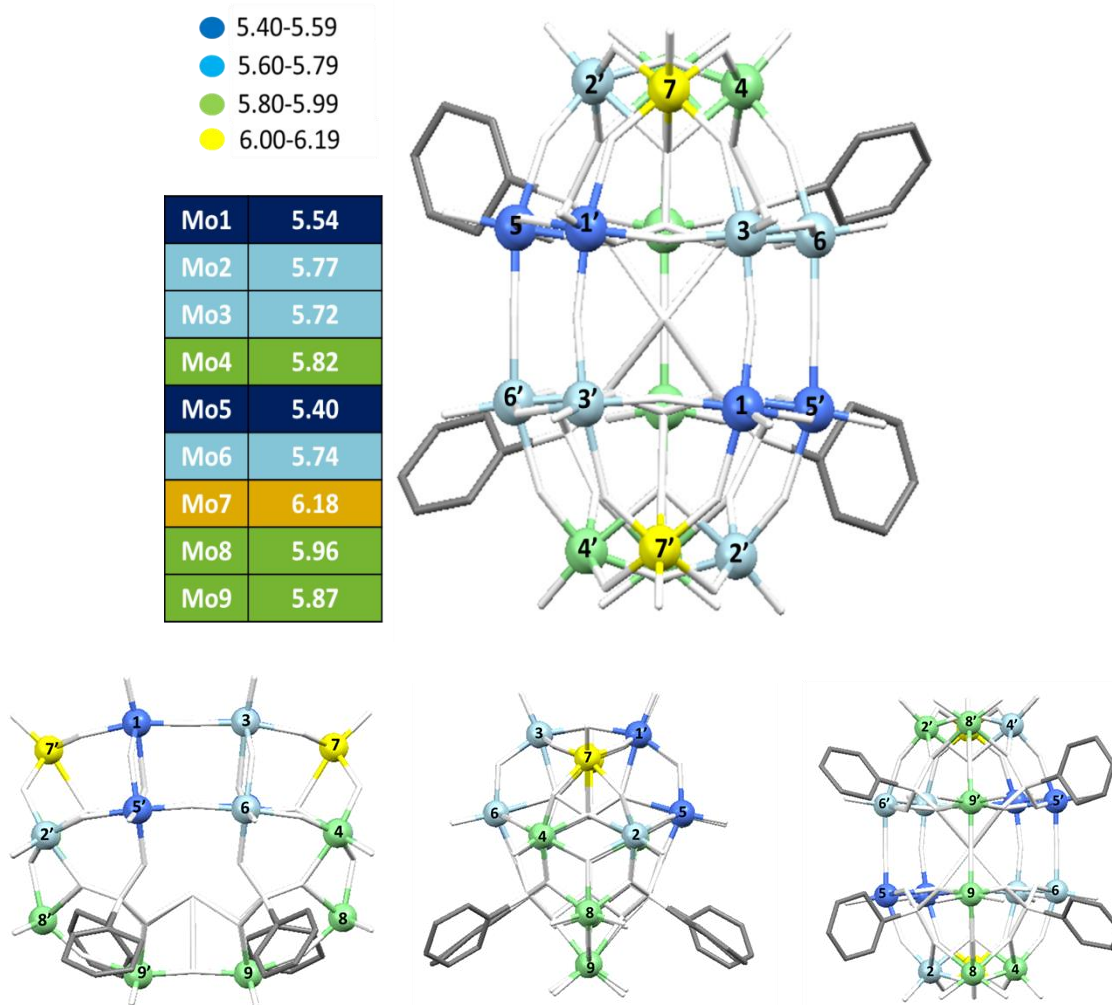

Figure S1-1. BVS values and cluster structure coloured by BVS values. Bond valence values were estimated by to  $s = \exp[-(l_{ij} - l_o)/B]$  where  $l_{ij} = 1.89$  and  $B = 0.314$ .

### 3. NMR

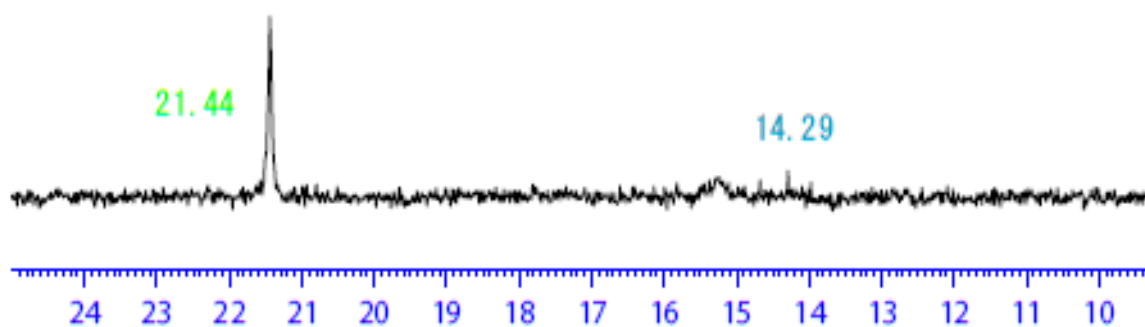

Figure S2-1.  $^{31}\text{P}$ -NMR of an aqueous solution of TEAH salt of cluster **1**.

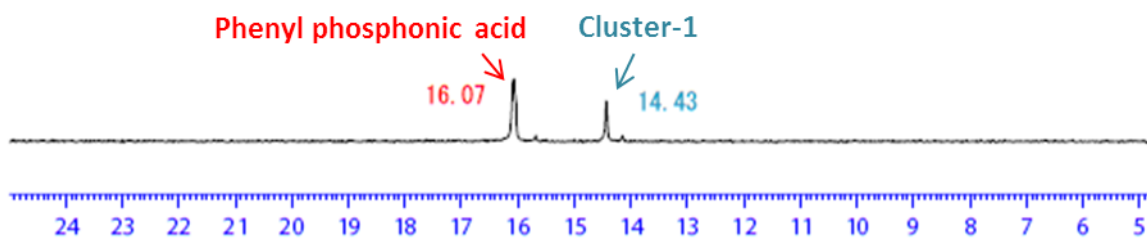

Figure S2-2.  $^{31}\text{P}$ -NMR of water-acetonitrile mixed solution (5:2) of mixture of cluster **1** and phenylphosphonic acid.

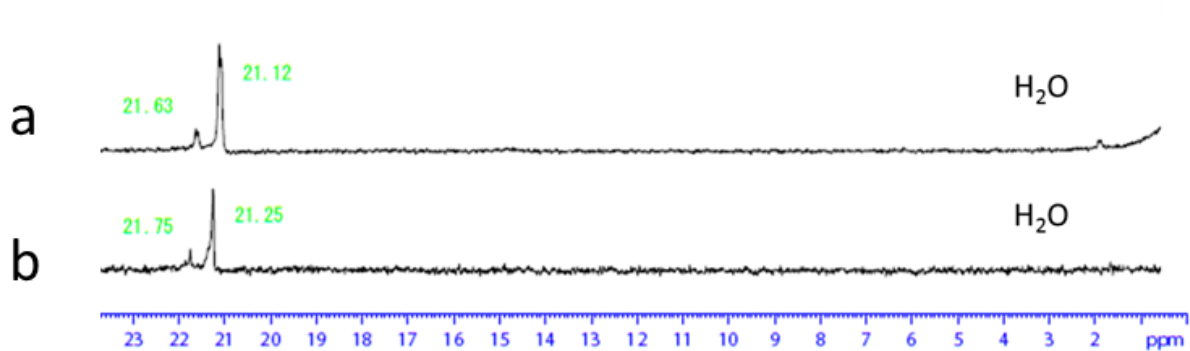

Figure S2-3.  $^{31}\text{P}$ -NMR of aqueous solution after reacting (a) 0.5 h and (b) 3 days.

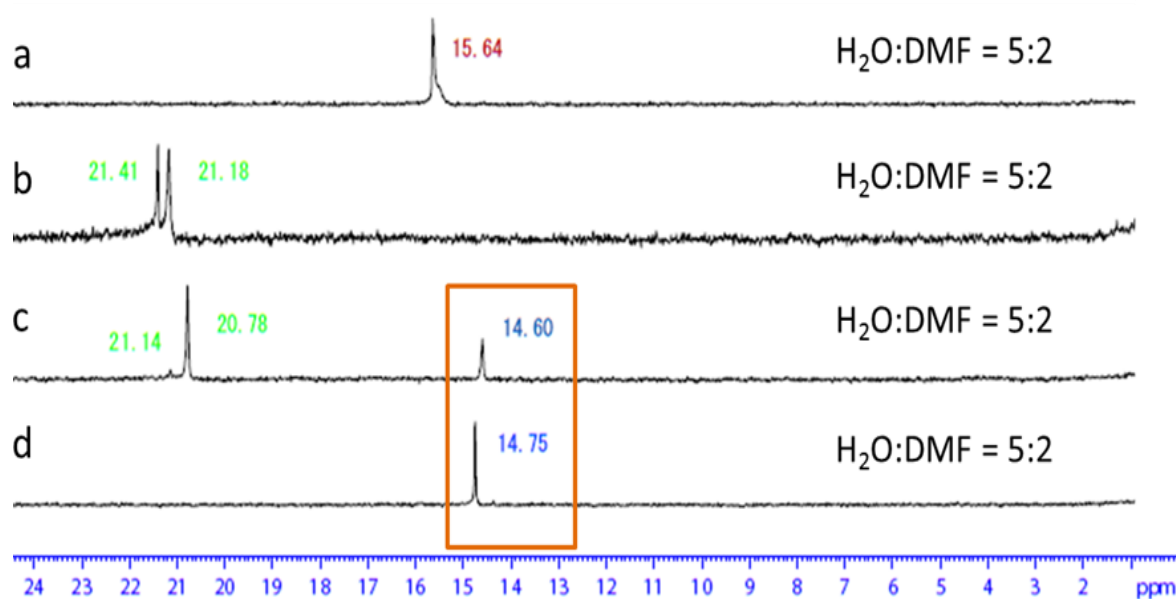

Figure S2-4.  $^{31}\text{P}$ -NMR of water-DMF mixed solution (5:2) of (a)  $\text{PhPO}_3\text{H}_2$ , reaction solution after (b) 0.5 h, (c) 3 days and (d) TBA salt of **1**.

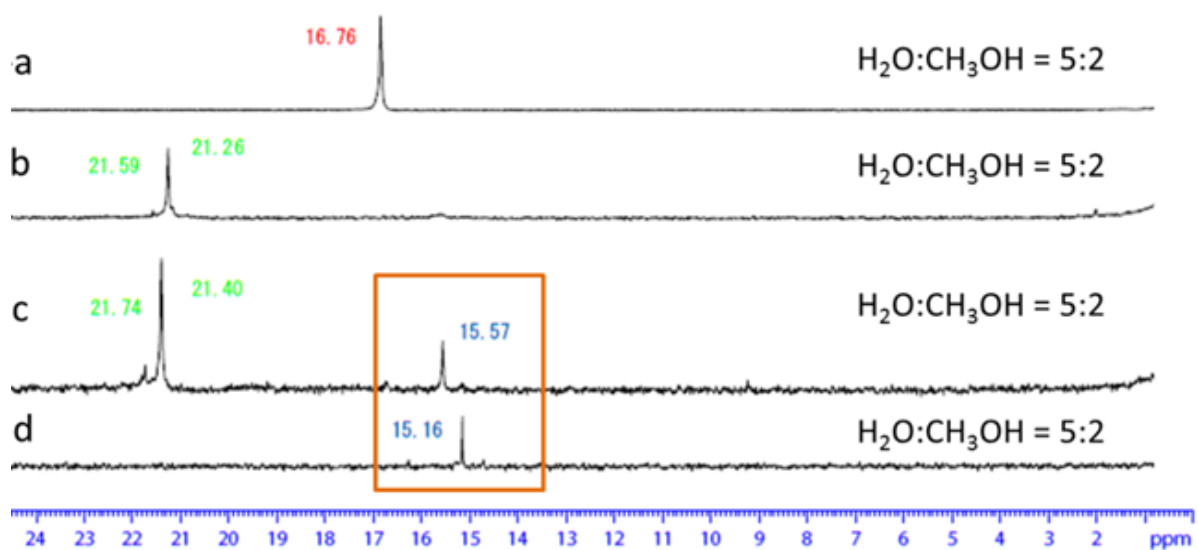

Figure S2-5.  $^{31}\text{P}$ -NMR of water-MeOH mixed solution (5:2) of (a)  $\text{PhPO}_3\text{H}_2$ , reaction solution after (b) 0.5 h, (c) 3 days and (d) TBA salt of **1**.

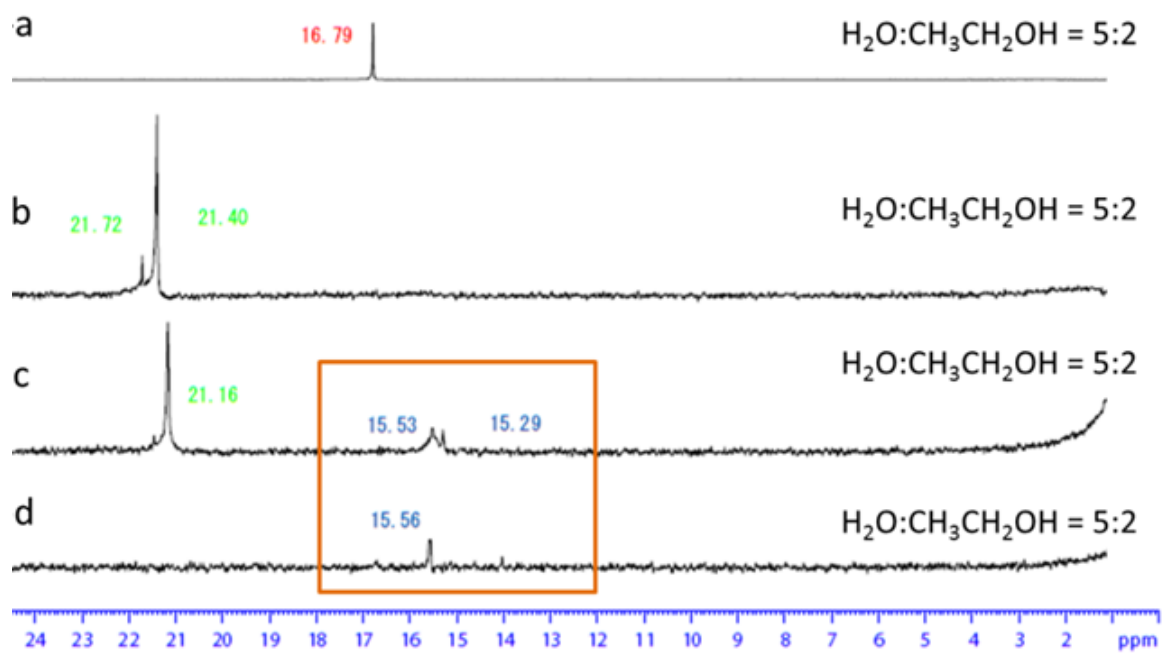

Figure S2-6.  $^{31}\text{P}$ -NMR of water-EtOH mixed solution (5:2) of (a)  $\text{PhPO}_3\text{H}_2$ , reaction solution after (b) 0.5 h, (c) 3 days and (d) TBA salt of **1**.

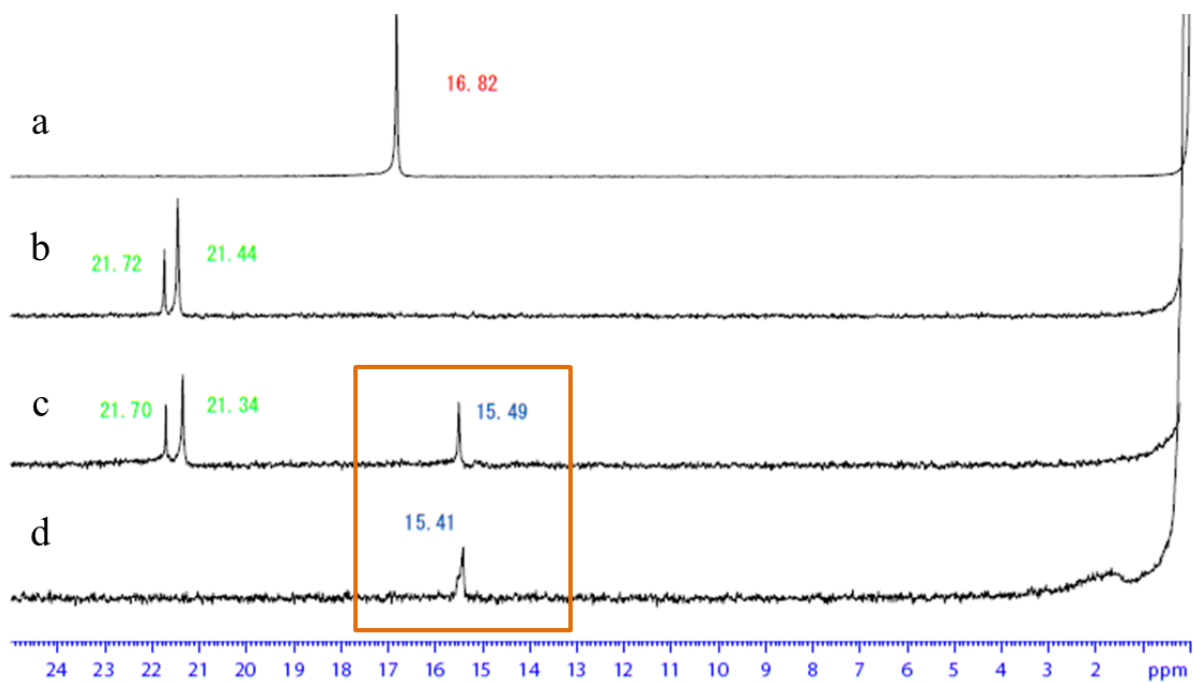

Figure S2-7.  $^{31}\text{P}$ -NMR of water-2-propanol mixed solution (5:2) of (a)  $\text{PhPO}_3\text{H}_2$ , reaction solution after (b) 0.5 h, (c) 3 days and (d) TBA salt of **1**.

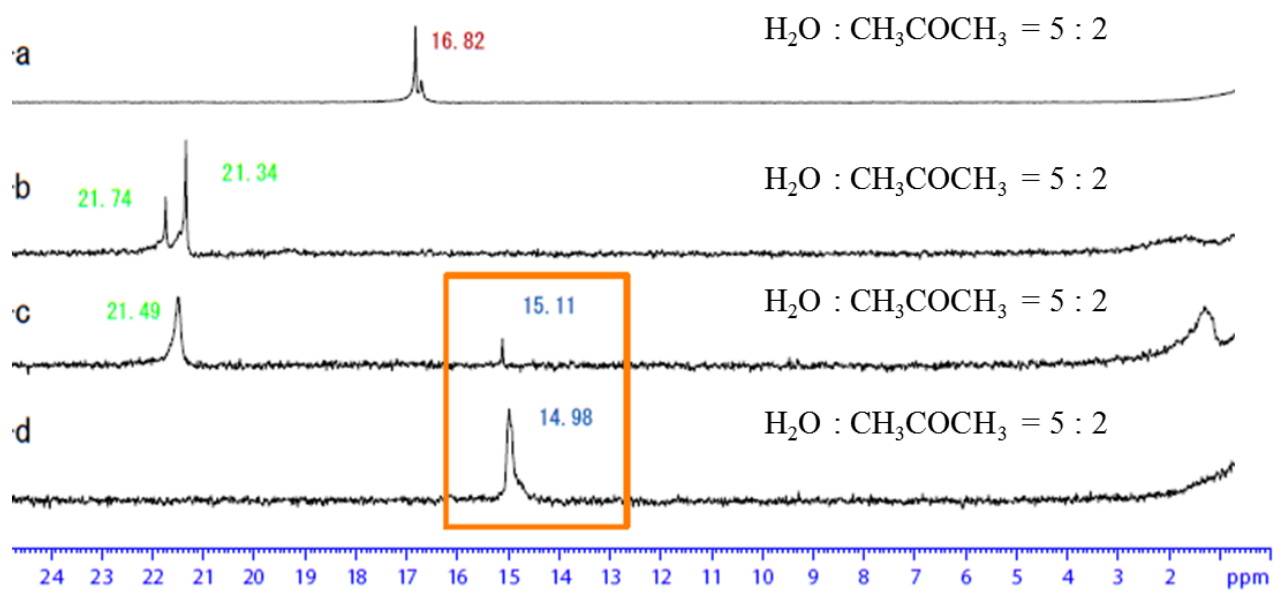

Figure S2-8.  $^{31}\text{P}$ -NMR of water-acetone mixed solution (5:2) of (a)  $\text{PhPO}_3\text{H}_2$ , reaction solution after (b) 0.5 h, (c) 3 days and (d) TBA salt of **1**.
